# Supplementary material for: Quantitative Chest Computed Tomography in Chronic Obstructive Pulmonary Disease: Assessing the Role of Emphysema Severity and its Correlation with Clinical Characteristics, Lung Function, and Plasma Levels of VEGF and IL-1β
Source: Research Square preprint supplement (doi:10.21203/rs.3.rs-5051887/v1), 2024-10-10
Supplement: Supplementary file 1 [file 7c16019b6b7f67a050ca0ac4.docx]

**Table 2. Comparison of Clinical, Subclinical Characteristics, and Cytokine Concentrations Across Different Emphysema Levels**

| **Indices** | **Level 0** | **Level 1** | **Level 2** | **p** |
| --- | --- | --- | --- | --- |
| Age, years, ± SD | 64.9 ± 6.5 | 69.4 ± 7.3 | 67.8 ± 6.2 | 0.3 |
| Duration of disease(year),±SD | 5.8 ± 5.6 | 6.8 ± 4.6 | 10.6 ± 7.6 | 0.3 |
| AECOPD/12 months, ± SD | 1.9 ± 0.9 | 2.3 ± 1.4 | 2.6 ± 0.9 | 0.5 |
| AECOPD hospitalization/12 months, ± SD | 1.5 ± 0.7 | 1.6 ± 0.9 | 1.8 ± 0.8 | 0.8 |
| BMI (kg/m2), ± SD | 23.3 ± 4.5 | 19.7 ± 3.4 | 17.8 ± 3.1 | **0.02** |
| mMRC score, ± SD | 2.1 ± 0.5 | 2.1 ± 0.6 | 2.6 ± 0.5 | 0.2 |
| CAT scores, ± SD | 18.1 ± 6.4 | 18.1± 4.6 | 18 ± 2.5 | 0.9 |
| 6MWT **(±** SD) | 319.1 ± 99.1 | 331.4 ± 96 | 330 ± 41.1 | 0.9 |
| FEV1%, ± SD | 55.3 ± 12.9 | 42.2 ± 13.6 | 31 ± 5.8 | **0.003** |
| FEV1/FVC %, ± SD | 52.4 ±10.3 | 42.6 ± 5.3 | 37 ± 5.3 | **0.001** |
| FVC (L), ± SD | 2.3 ± 0.4 | 1.9 ± 0.5 | 2.1 ± 0.4 | 0.1 |
| **GOLD stages, n(%)** |  |  |  |  |
| - GOLD 2 | 07 (63.6) | 04 (28.6) | 0 |  |
| - GOLD 3 | 04 (36.4) | 08 (57.1) | 02 (40) | **0.01** |
| - GOLD 4 | 0 | 02 (14.3) | 03 (60) |  |
| White blood cells (G/L) | 8.5 ± 2.2 | 7.9 ± 3 | 11.2 ± 3.4 | 0.09 |
| Albumin (g/l), ± SD | 39.2 ± 2.8 | 35.9 ± 2.8 | 36.6 ± 3 | **0.02** |
| CRP (mg/dL), ± SD | 15 ± 27.3 | 14.3 ± 24.3 | 18.8 ± 40.5 | 0.9 |
| **Arterial blood gas** |  |  |  |  |
| - PaO2 (mmHg),± SD | 84.3 ± 9.8 | 80.3 ± 10.1 | 80.3 ± 18.2 | 0.7 |
| - PaCO2 (mmHg),± SD | 43.8 ± 3.7 | 43.2 ± 5.1 | 50.6 ± 6.9 | **0.02** |
| - SaO2 | 96 ± 1.2 | 95.4 ± 1.6 | 94.5 ± 3.5 | 0.3 |
| - pH, ± SD | 7.42 ± 0.02 | 7.44 ± 0.04 | 7.41 ± 0.02 | 0.1 |
| VEGF (ng/dL), ± SD | 76.4 ± 37.4 | 78.8 ± 55.3 | 32.8 ± 20.6 | 0.1 |
| IL-1β (ng/dL), ± SD | 15.7 ± 14.5 | 7.1 ± 7.5 | 9.4 ± 0.7 | 0.3 |

*Data are presented as median (IQR) and n (%)*
