# Supplementary material for: Quantitative Chest Computed Tomography in Chronic Obstructive Pulmonary Disease: Assessing the Role of Emphysema Severity and its Correlation with Clinical Characteristics, Lung Function, and Plasma Levels of VEGF and IL-1β
Source: Research Square preprint supplement (doi:10.21203/rs.3.rs-5051887/v1), 2024-10-10
Supplement: Supplementary file 2 [file b2ffc7090ef5aa404f71021c.docx]

Table 1. Demographics and Biomedical, QCT Characteristics of the Study Population

| **Indices** | **Patients (n = 30)** |
| --- | --- |
| Age (years), ± SD | 67,5 ± 6,9 |
| Smoking History, n(%) | 30 (100) |
| Duration of disease (years), ± SD | 7,07 ± 5,6 |
| AECOPD in last 12 months, ± SD | 2,2 ± 1,2 |
| AECOPD relate hospitalization in last 12 months, ± SD | 1,63 ± 0,8 |
| BMI (kg/m2), ± SD | 20, 7 ± 4,3 |
| mMRC score, ± SD | 2,23 ± 0,57 |
| 6MWT **(±** SD) | 326,7 ± 88,2 |
| CAT | 18,1 ± 4,9 |
| BODE | 4,33 ± 1,62 |
| FVC | 2,12 ± 0,5 |
| Post-bronchodilator FEV1%, ± SD | 45,1 ± 14,9 |
| FEV1/FVC %, ± SD | 45,3 ± 9,4 |
| **GOLD stages, n(%)** |  |
| - GOLD 2 | 11 (36.7) |
| - GOLD 3 | 14 (46.7) |
| - GOLD 4 | 05 (16.7) |
| White blood cells (G/L) | 8,7 ± 2,99 |
| Albumin (g/l), ± SD | 37,2 ± 3,2 |
| CRP (mg/dL), ± SD | 15,3 ± 27,4 |
| **Arterial blood gas** |  |
| - PaO2 (mmHg), ± SD | 81,8 ± 11,3 |
| - PaCO2 (mmHg), ± SD | 44,6 ± 5,56 |
| - SaO2 (%), ± SD | 95,5 ± 1,92 |
| - pH, ± SD | 7,42 ± 0,03 |
| VEGF (pg/ml), ± SD | 70 ± 46.6 |
| IL-1 (pg/ml), ± SD | 11.2 ± 11 |
| **Emphysema percentage**, ± SD |  |
| - Right lung | 13,25 ± 13,97 |
| - Left lung | 13,04 ± 11,05 |
| - Total | 12,8 ± 11,64 |
| - Emphysema - predominant, n (%) | 01 (3,3) |

*Data are presented as ± SD and n (%)*
